# Supplementary material
Source: bioRxiv or medRxiv preprint supplement (https://medrxiv.org/highwire/filestream/87471/field_highwire_adjunct_files/0/2020.06.06.20123414-1.pdf)
Supplement: Supplementary file [file 2020.06.06.20123414-1.pdf]

# Extended Data Fig. 1

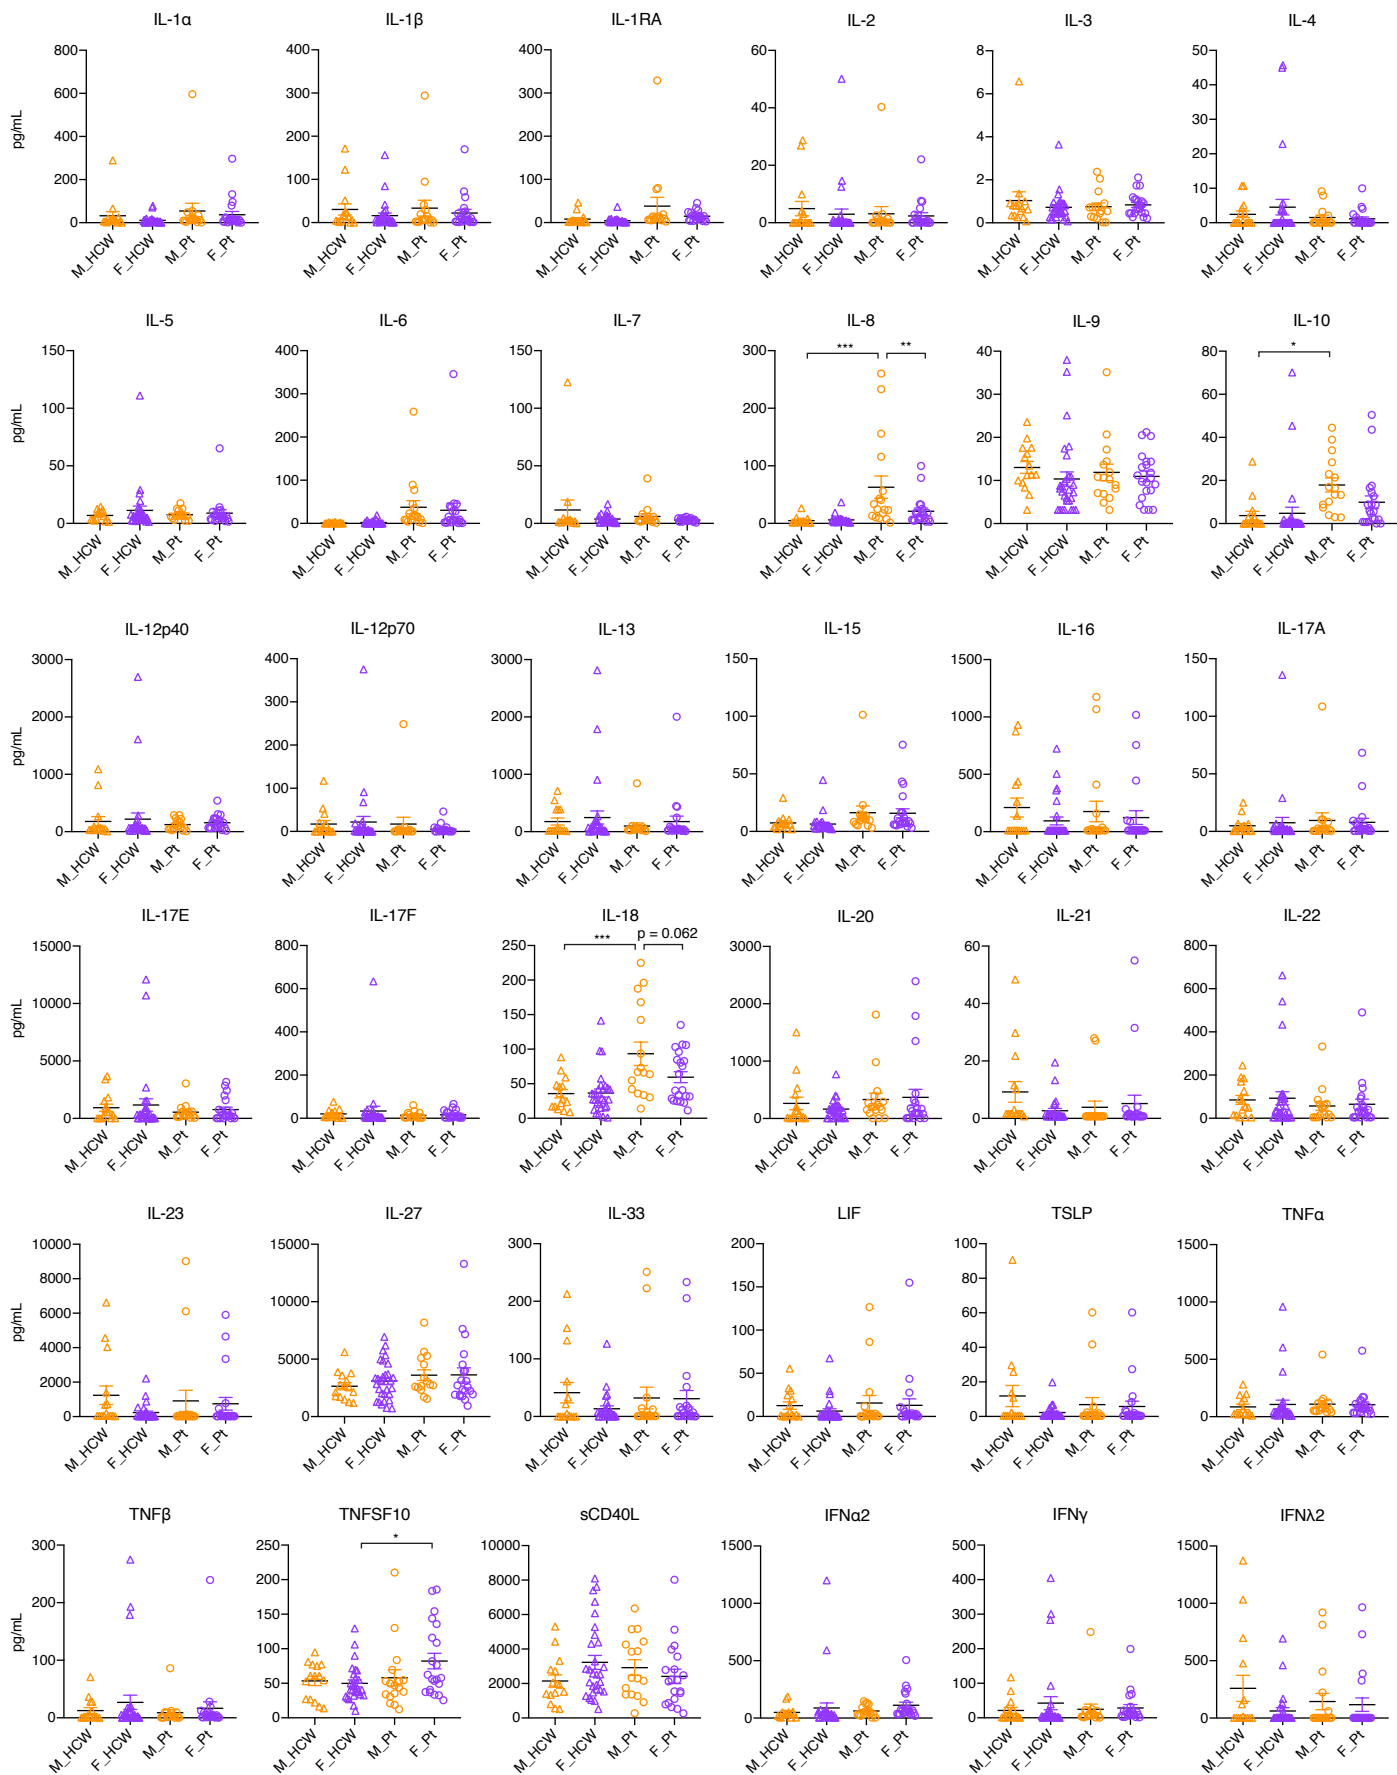

**Extended Data Fig. 1. ELISA array results of 36 cytokines/IFNs with the HCWs' and patients' plasma.** Plasma levels of cytokines and IFNs in 44 HCW controls (M : F = 15 : 29) and 38 patients in Cohort A (M : F = 17 : 21) are shown. Data are mean  $\pm$  SEM. Bonferroni's multiple comparison test was used for the comparison between M\_Pt vs F\_Pt, M\_HCW vs F\_HCW, M\_HCW vs M\_Pt, and F\_HCW vs F\_Pt. \* $P < 0.05$ , \*\* $P < 0.01$ , \*\*\* $P < 0.001$ , \*\*\*\* $P < 0.0001$ . All  $p$ -values  $< 0.10$  are shown.

## Extended Data Fig. 2

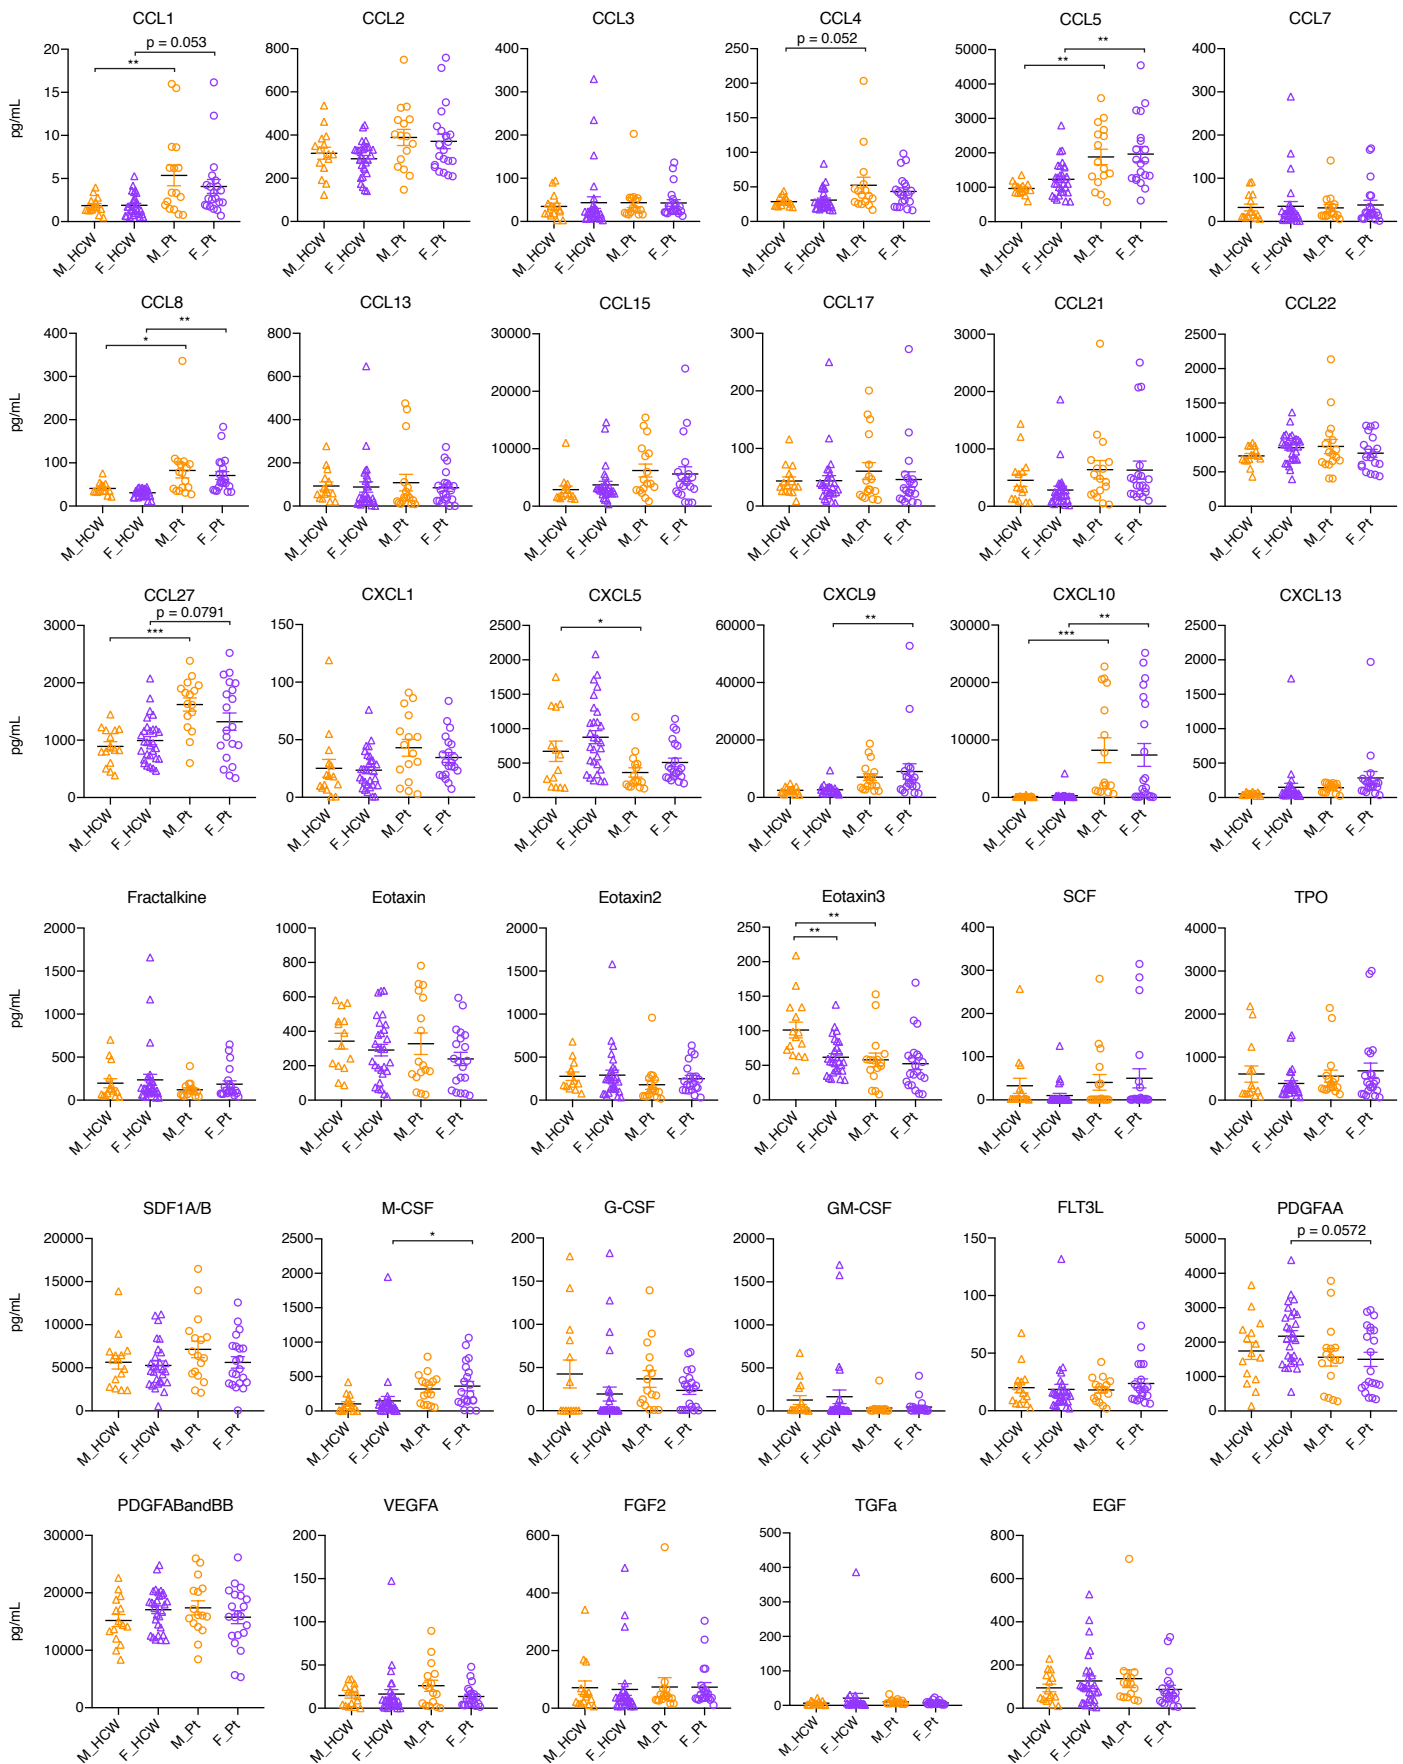

**Extended Data Fig. 2. ELISA array results of 35 chemokines and growth factors with the HCWs' and patients' plasma.** Plasma levels of chemokines and growth factors in 44 HCW controls (M : F = 15 : 29) and 38 patients in Cohort A (M : F = 17 : 21) are shown. Bonferroni's multiple comparison test was used for the comparison between M\_Pt vs F\_Pt, M\_HCW vs F\_HCW, M\_HCW vs M\_Pt, and F\_HCW vs F\_Pt. Data are mean  $\pm$  SEM. \*P < 0.05, \*\*P < 0.01, \*\*\*P < 0.001, \*\*\*\*P < 0.0001. All p-values < 0.10 are shown.

**Extended Data Table 1.** Demographic and clinical characteristics of Cohort B and healthcare worker comparison groups

|                                            | <b>Patients (N = 93)</b> |              | <b>Healthcare Workers (N = 103)<sup>1</sup></b> |              |
|--------------------------------------------|--------------------------|--------------|-------------------------------------------------|--------------|
|                                            | Female – N (%)           | Male – N (%) | Female – N (%)                                  | Male – N (%) |
| <b>Total</b>                               | 48 (51.6)                | 45 (48.4)    | 78 (75.7)                                       | 25 (24.3)    |
| <b>Ethnicity<sup>2</sup></b>               |                          |              |                                                 |              |
| Black/African American                     | 16 (34.0)                | 10 (22.2)    |                                                 |              |
| White                                      | 24 (51.1)                | 26 (57.8)    |                                                 |              |
| Hispanic                                   | 6 (12.8)                 | 8 (17.8)     |                                                 |              |
| Other                                      | 0 (0.0)                  | 0 (0.0)      |                                                 |              |
| <b>BMI<sup>2</sup></b>                     |                          |              |                                                 |              |
| < 18                                       | 2 (4.3)                  | 0 (0.0)      | 2 (2.6)                                         | 0 (0.0)      |
| 18 – 24.9                                  | 8 (17.0)                 | 7 (15.6)     | 39 (50.7)                                       | 5 (21.7)     |
| 25 – 29.9                                  | 10 (21.3)                | 17 (37.8)    | 19 (24.7)                                       | 12 (52.2)    |
| 30 – 34.9                                  | 17 (36.2)                | 11 (24.4)    | 8 (10.4)                                        | 1 (4.4)      |
| 35 +                                       | 10 (21.3)                | 10 (22.2)    | 9 (11.7)                                        | 5 (21.7)     |
| <b>COVID Risk Factors<sup>3</sup></b>      |                          |              |                                                 |              |
| Recent cancer treatment                    | 3 (6.3)                  | 4 (8.9)      |                                                 |              |
| Chronic heart disease                      | 9 (18.8)                 | 11 (24.4)    |                                                 |              |
| Hypertension                               | 20 (41.7)                | 25 (55.6)    |                                                 |              |
| Chronic lung disease                       | 16 (33.3)                | 6 (13.3)     |                                                 |              |
| Immunosuppression                          | 4 (8.3)                  | 1 (2.2)      |                                                 |              |
| <b>Received Tocilizumab</b>                | 30 (62.5)                | 32 (66.7)    |                                                 |              |
| <b>Received Corticosteroids</b>            | 8 (16.7)                 | 7 (14.6)     |                                                 |              |
| <b>Admitted to the ICU</b>                 | 12 (25.0)                | 11 (22.9)    |                                                 |              |
| <b>Number of samples</b>                   |                          |              |                                                 |              |
| 1                                          | 48 (100.0)               | 45 (100.0)   | 78 (100.0)                                      | 25 (100.0)   |
| 2                                          | 28 (58.3)                | 26 (58.8)    | 8 ()                                            | 1 ()         |
| 3                                          | 11 (22.9)                | 7 (15.6)     | 0 (0.0)                                         | 0 (0.0)      |
| 4                                          | 5 (10.4)                 | 4 (8.9)      | 0 (0.0)                                         | 0 (0.0)      |
| 5                                          | 2 (4.2)                  | 0 (0.0)      | 0 (0.0)                                         | 0 (0.0)      |
| 6                                          | 2 (4.2)                  | 0 (0.0)      | 0 (0.0)                                         | 0 (0.0)      |
| 7                                          | 1 (2.1)                  | 0 (0.0)      | 0 (0.0)                                         | 0 (0.0)      |
| 8                                          | 1 (2.1)                  | 0 (0.0)      | 0 (0.0)                                         | 0 (0.0)      |
| <b>Age – mean (SD)</b>                     | 61.8 (16.4)              | 60.0 (16.0)  | 36.4 (11.4)                                     | 42.0 (13.0)  |
| <b>Days from symptom onset – mean (SD)</b> | 11.1 (7.0)               | 11.9 (7.3)   |                                                 |              |

**Clinical Score – mean (SD)**

2.5 (1.4)

2.8 (1.3)

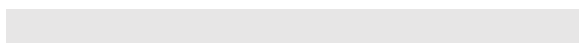

<sup>1</sup>Gray areas indicate not applicable or no data available

<sup>2</sup>Cells may not sum to total due to missing data

<sup>3</sup>Categories not mutually exclusive

**Extended Data Table 2.** Demographic and clinical characteristics of Cohort A and healthcare worker comparison groups

|                                            | <b>Cohort A (N = 39)</b> |              | <b>Healthcare Workers<br/>ELISA (N = 44)</b> |              | <b>Healthcare Workers<br/>Flow cytometry (N = 50)</b> |              |
|--------------------------------------------|--------------------------|--------------|----------------------------------------------|--------------|-------------------------------------------------------|--------------|
|                                            | Female - N (%)           | Male – N (%) | Female – N (%)                               | Male – N (%) | Female – N (%)                                        | Male – N (%) |
| <b>Total</b>                               | 22 (56.4)                | 17 (43.4)    | 29 (65.9)                                    | 15 (34.1)    | 44 (88.0)                                             | 6 (12.0)     |
| <b>Ethnicity<sup>2</sup></b>               |                          |              |                                              |              |                                                       |              |
| Black/African American                     | 4 (18.2)                 | 5 (29.4)     |                                              |              |                                                       |              |
| White                                      | 14 (63.6)                | 9 (52.9)     |                                              |              |                                                       |              |
| Hispanic                                   | 4 (18.2)                 | 2 (11.8)     |                                              |              |                                                       |              |
| Other                                      | 0 (0.0)                  | 0 (0.0)      |                                              |              |                                                       |              |
| <b>BMI<sup>2</sup></b>                     |                          |              |                                              |              |                                                       |              |
| < 18                                       | 1 (4.6)                  | 0 (0.0)      | 0 (0.0)                                      | 0 (0.0)      | 2 (4.5)                                               | 0 (0.0)      |
| 18 – 24.9                                  | 6 (27.3)                 | 4 (23.5)     | 17 (58.6)                                    | 2 (13.3)     | 17 (38.6)                                             | 3 (50.0)     |
| 25 – 29.9                                  | 5 (22.7)                 | 7 (41.2)     | 6 (20.7)                                     | 7 (46.7)     | 12 (27.3)                                             | 1 (16.7)     |
| 30 – 34.9                                  | 8 (36.4)                 | 3 (17.7)     | 0 (0.0)                                      | 1 (6.7)      | 6 (13.6)                                              | 0 (0.0)      |
| 35 +                                       | 2 (9.1)                  | 3 (17.7)     | 4 (13.8)                                     | 4 (26.7)     | 6 (13.6)                                              | 2 (33.3)     |
| <b>COVID Risk Factors<sup>3</sup></b>      |                          |              |                                              |              |                                                       |              |
| Recent cancer treatment                    | 3 (13.6)                 | 1 (5.9)      |                                              |              |                                                       |              |
| Chronic heart disease                      | 3 (13.6)                 | 7 (41.2)     |                                              |              |                                                       |              |
| Hypertension                               | 7 (31.8)                 | 10 (58.8)    |                                              |              |                                                       |              |
| Chronic lung disease                       | 4 (18.2)                 | 4 (23.5)     |                                              |              |                                                       |              |
| Immunosuppression                          | 3 (13.6)                 | 1 (5.9)      |                                              |              |                                                       |              |
| <b>Age – mean (SD)</b>                     | 60.2 (16.6)              | 59.2 (17.8)  | 41.3 (13.5)                                  | 47.5 (10.8)  | 36.8 (11.0)                                           | 29.0 (7.6)   |
| <b>Days from symptom onset – mean (SD)</b> | 12.3 (9.0)               | 9.2 (5.5)    |                                              |              |                                                       |              |
| <b>Clinical Score – mean (SD)</b>          | 1.27 (0.46)              | 1.47 (0.62)  |                                              |              |                                                       |              |
| <b>On Hydroxychloroquine<sup>4</sup></b>   | 18 (81.8)                | 11 (64.7)    |                                              |              |                                                       |              |
| <b>On Remdesivir<sup>4</sup></b>           | 2 (9.1)                  | 1 (5.9)      |                                              |              |                                                       |              |

<sup>1</sup>Gray areas indicate not applicable or no data available

<sup>2</sup>Cells may not sum to total due to missing data

<sup>3</sup>Categories not mutually exclusive

<sup>4</sup>Status at the first sample collection

**Extended Data Table 3. Thirty-nine Cohort A Patient background and sample information**

| <b>ID</b> | <b>Sex</b> | <b>Age<br/>(Range)</b> | <b>Ethnicity</b>       | <b>BMI</b> | <b>DFSO<sup>2</sup></b> | <b>C<sub>1</sub><sup>3</sup></b> | <b>C<sub>max</sub><sup>4</sup></b> | <b>Available data type<sup>5</sup></b> |
|-----------|------------|------------------------|------------------------|------------|-------------------------|----------------------------------|------------------------------------|----------------------------------------|
| Pt01      | F          | 40s                    | White                  | 35.0       | 17                      | 1                                | 1                                  | N, S, E, F                             |
| Pt02      | F          | 40s                    | White                  | 19.5       | 14                      | 1                                | 1                                  | E, F                                   |
| Pt03      | F          | 50s                    | Black/African American | 30.1       | 5                       | 2                                | 3                                  | N, S, G, M, E, F                       |
| Pt04      | F          | 50s                    | Black/African American | 30.3       | 7                       | 1                                | 3                                  | N, G, M, E, F                          |
| Pt05      | F          | 60s                    | White                  | 23.9       | 7                       | 1                                | 1                                  | N, G, M, E, F                          |
| Pt06      | F          | 70s                    | Black/African American | 20.2       | 10                      | 1                                | 3                                  | N, S, G, M, E, F                       |
| Pt07      | F          | 40s                    | Hispanic               | 33.3       | 34                      | 1                                | 1                                  | N, S, G, M, E, F                       |
| Pt08      | F          | 20s                    | White                  | 33.5       | 20                      | 1                                | 1                                  | N, S, G, M, E, F                       |
| Pt09      | F          | 60s                    | White                  | 26.6       | 3                       | 2                                | 3                                  | N, S, G, M, E, F                       |
| Pt10      | F          | 60s                    | White                  | 21.6       | 9                       | 1                                | 1                                  | S, G, M, E, F                          |
| Pt11      | F          | 50s                    | White                  | 27.1       | 12                      | 2                                | 1                                  | N, S, G, M, E, F                       |
| Pt12      | F          | 80s                    | Hispanic               | 21.7       | 5                       | 1                                | 1                                  | E, F                                   |
| Pt13      | F          | 90s                    | White                  | 18.5       | 3                       | 2                                | 1                                  | N, G, M, E, F                          |
| Pt14      | F          | 60s                    | White                  | 47.2       | 1                       | 2                                | 3                                  | N, G, M, E, F                          |
| Pt15      | F          | 70s                    | White                  | 28.6       | 6                       | 1                                | 1                                  | N, S, G, M, E, F                       |
| Pt16      | F          | 80s                    | White                  | 27.1       | 15                      | 1                                | 1                                  | S, G, M, F                             |
| Pt17      | F          | 70s                    | White                  | 31.8       | 13                      | 1                                | 1                                  | N, G, M, E, F                          |
| Pt18      | F          | 80s                    | Black/African American | 33.6       | 12                      | 1                                | 1                                  | N, G, M, E, F                          |
| Pt19      | F          | 30s                    | White                  | 34.7       | 3                       | 1                                | 1                                  | G, M, E, F                             |
| Pt20      | F          | 50s                    | White                  | 24.1       | 17                      | 1                                | 1                                  | G, M, E, F                             |
| Pt21      | F          | 70s                    | Hispanic               | 35.2       | 10                      | 2                                | 3                                  | G, M, E, F                             |
| Pt22      | F          | 50s                    | Hispanic               | 25.2       | 27                      | 1                                | 1                                  | G, M, E, F                             |
| Pt23      | M          | 60s                    | White                  | 27.9       | 21                      | 1                                | 1                                  | N, S, G, M, E, F                       |
| Pt24      | M          | 40s                    | White                  | 25.6       | 10                      | 1                                | 1                                  | N, S, E, F                             |

|      |   |     |                        |      |    |    |   |                  |
|------|---|-----|------------------------|------|----|----|---|------------------|
| Pt25 | M | 50s | White                  | 31.5 | 15 | 1  | 1 | E, F             |
| Pt26 | M | 60s | Black/African American | 31.0 | 7  | 1  | 3 | N, S, G, M, E, F |
| Pt27 | M | 80s | White                  | 35.6 | 22 | 2  | 3 | N, G, M, E, F    |
| Pt28 | M | 60s | Unknown/Unavailable    | 25.3 | 11 | 2  | 3 | N, S, E, F       |
| Pt29 | M | 60s | White                  | 35.5 | 9  | 2  | 1 | N, S, G, M, E, F |
| Pt30 | M | 70s | White                  | 24.6 | 3  | 1  | 1 | N, S, G, M, E, F |
| Pt31 | M | 80s | Black/African American | 35.2 | 23 | 3* | 5 | N, S, G, M, E, F |
| Pt32 | M | 90s | White                  | 29.8 | 9  | 2  | 3 | N, G, M, E, F    |
| Pt33 | M | 80s | Black/African American | 47.3 | 8  | 1  | 4 | G, M, E, F       |
| Pt34 | M | 20s | Black/African American | 29.5 | 8  | 2  | 1 | G, M, E, F       |
| Pt35 | M | 30s | Black/African American | 28.0 | 4  | 1  | 1 | N, G, M, E, F    |
| Pt36 | M | 50s | Hispanic               | 22.1 | 7  | 1  | 1 | N, S, G, M, E, F |
| Pt37 | M | 40s | Hispanic               | 19.3 | 7  | 1  | 1 | N, G, M, E, F    |
| Pt38 | M | 80s | White                  | 23.3 | 4  | 2  | 1 | N, G, M, E, F    |
| Pt39 | M | 50s | White                  | 26.4 | 6  | 1  | 1 | N, S, G, M, E, F |

1. Days from symptom onset at the first sample collection

2.  $C_1$ : Clinical score at the first sample collection date

3.  $C_{max}$ : Maximum clinical score during the admission later than the first sample collection date

4. Collected sample/data types at the first sample collection date. N; Nasopharyngeal viral load, S; Saliva viral load, G; Plasma anti-S1-IgG, M; Plasma anti-S1-IgM, E; Plasma ELISA, F; PBMC flow cytometry

\*In Pt31, Toci was started on the day of the first sample collection.

**Extended Data Table 4.** Adjusted least square means difference over time in immune response between male and female COVID-19 patients<sup>1</sup> in Cohort B. Sample numbers (N) used for each assay and analysis are summarized below the table.

|                                                             | Female vs. Male Patients |         |
|-------------------------------------------------------------|--------------------------|---------|
|                                                             | Difference (95% CI)      | p-value |
| <b>Viral Load<sup>2</sup></b>                               |                          |         |
| Nasopharyngeal                                              | -0.50 (-0.58, 1.57)      | 0.37    |
| Saliva                                                      | -0.73 (-0.35, 1.80)      | 0.18    |
| <b>Antibody<sup>3</sup></b>                                 |                          |         |
| Anti-S1IgG                                                  | 0.04 (-0.25, 0.33)       | 0.80    |
| Anti-S1IgM                                                  | 0.02 (-0.17, 0.21)       | 0.86    |
| <b>Interferon Response<sup>4</sup></b>                      |                          |         |
| IFN $\alpha$ 2                                              | 0.25 (0.02, 0.49)        | 0.03    |
| IFN $\gamma$                                                | 0.14 (-0.14, 0.41)       | 0.32    |
| IFN $\lambda$ 2                                             | -0.06 (-0.43, 0.31)      | 0.74    |
| <b>Cytokines, Chemokines and Growth Factors<sup>4</sup></b> |                          |         |
| IL-1 $\beta$                                                | 0.05 (-0.24, 0.34)       | 0.73    |
| IL-1RA                                                      | -0.09 (-0.38, 0.19)      | 0.51    |
| IL-18                                                       | -0.05 (-0.28, 0.18)      | 0.66    |
| IL-6                                                        | -0.04 (-0.38, 0.30)      | 0.81    |
| IL-8                                                        | -0.05 (-0.26, 0.17)      | 0.66    |
| CXCL10                                                      | -0.23 (-0.55, 0.09)      | 0.16    |
| CCL2                                                        | -0.07 (-0.16, 0.03)      | 0.18    |
| CCL5                                                        | -0.14 (-0.24, -0.04)     | 0.008   |
| M-CSF                                                       | -0.02 (-0.34, 0.30)      | 0.90    |
| CCL4                                                        | -0.10 (-0.21, 0.01)      | 0.08    |
| TNFSF10                                                     | 0.04 (-0.11, 0.19)       | 0.61    |
| G-CSF                                                       | -0.14 (-0.52, 0.24)      | 0.46    |
| <b>PBMC Composition<sup>5</sup></b>                         |                          |         |
| T Cells                                                     | 5.49 (-1.45, 12.43)      | 0.12    |
| B Cells                                                     | -1.09 (-2.74, 0.57)      | 0.20    |
| cMono                                                       | -1.01 (-2.97, 0.94)      | 0.31    |
| intMono                                                     | 0.56 (-0.59, 1.70)       | 0.34    |
| ncMono                                                      | -1.80 (-6.00, 2.39)      | 0.40    |
| <b>T Cell Phenotypes<sup>6</sup></b>                        |                          |         |
| CD4                                                         | 0.71 (-6.12, 7.54)       | 0.84    |
| CD8                                                         | 3.10 (-2.01, 8.20)       | 0.23    |
| CD38+HLA-DR+CD4                                             | -0.19 (-0.78, 0.40)      | 0.52    |
| CD38+HLA-DR+CD8                                             | 0.67 (-0.37, 1.71)       | 0.21    |
| PD-1+TIM-3+CD4                                              | 0.18 (-0.18, 0.54)       | 0.33    |
| PD-1+TIM-3+CD8                                              | 0.30 (-0.25, 0.85)       | 0.29    |

<sup>1</sup>Adjusted for age, days from symptom onset, Toci treatment, CS treatment and ICU status

<sup>2</sup>Log<sub>10</sub>(SARS-CoV-2 copies/mL). N<sub>plod</sub>: N<sub>F\_Pt</sub> = 27, N<sub>M\_Pt</sub> = 25. Sload: N<sub>F\_Pt</sub> = 16, N<sub>M\_Pt</sub> = 14.

<sup>3</sup>OD450. N<sub>F\_Pt</sub> = 41, N<sub>M\_Pt</sub> = 37.



---

<sup>4</sup>Log<sub>10</sub> pg/mL. N<sub>F\_Pt</sub> = 43, N<sub>M\_Pt</sub> = 38.

<sup>5</sup>As percent of live cells. N<sub>F\_Pt</sub> = 42, N<sub>M\_Pt</sub> = 36.

<sup>6</sup>As percent of CD3-positive cells. N<sub>F\_Pt</sub> = 42, N<sub>M\_Pt</sub> = 36.

**Extended Data Table 5.** Adjusted least square means difference over time in immune response between male and female COVID-19 patients in the Cohort B and male and female healthcare workers.<sup>1</sup>  
Sample numbers (N) used for each assay and analysis are summarized below the table.

|                                                             | <b>Female Patients vs. Female Healthcare Workers</b> |         | <b>Male Patients vs. Male Healthcare Workers</b> |         | <b>Difference-in-Differences</b> |         |
|-------------------------------------------------------------|------------------------------------------------------|---------|--------------------------------------------------|---------|----------------------------------|---------|
|                                                             | Difference (95% CI)                                  | p-value | Difference (95% CI)                              | p-value | Difference (95% CI)              | p-value |
| <b>Antibody<sup>2</sup></b>                                 |                                                      |         |                                                  |         |                                  |         |
| Anti-S1IgG                                                  | 1.00 (0.70, 1.30)                                    | <0.001  | 0.99 (0.73, 1.25)                                | <0.001  | 0.01 (-0.29, 0.31)               | 0.96    |
| Anti-S1IgM                                                  | 0.72 (0.47, 0.96)                                    | <0.001  | 0.72 (0.45, 0.98)                                | <0.001  | 0.001 (-0.22, 0.22)              | 0.99    |
| <b>Interferon Response<sup>3</sup></b>                      |                                                      |         |                                                  |         |                                  |         |
| IFN $\alpha$ 2                                              | 0.54 (0.25, 0.83)                                    | <0.001  | 0.17 (-0.15, 0.49)                               | 0.29    | 0.36 (-0.003, 0.73)              | 0.05    |
| IFN $\gamma$                                                | 0.61 (0.24, 0.99)                                    | 0.002   | 0.34 (-0.20, 0.89)                               | 0.22    | 0.27 (-0.37, 0.91)               | 0.41    |
| IFN $\lambda$ 2                                             | -0.19 (-0.68, 0.30)                                  | 0.44    | -0.47 (-1.02, 0.08)                              | 0.09    | 0.28 (-0.35, 0.90)               | 0.38    |
| <b>Cytokines, Chemokines and Growth Factors<sup>3</sup></b> |                                                      |         |                                                  |         |                                  |         |
| IL-1 $\beta$                                                | 0.24 (-0.13, 0.61)                                   | 0.21    | 0.26 (-0.27, 0.80)                               | 0.33    | -0.03 (-0.60, 0.66)              | 0.93    |
| IL-1RA                                                      | 0.82 (0.56, 1.08)                                    | <0.001  | 0.71 (0.41, 1.02)                                | <0.001  | 0.11 (-0.27, 0.50)               | 0.57    |
| IL-18                                                       | 0.44 (0.09, 0.80)                                    | 0.02    | 0.39 (0.08, 0.69)                                | 0.01    | 0.05 (-0.27, 0.38)               | 0.75    |
| IL-6                                                        | 1.85 (1.41, 2.30)                                    | <0.001  | 2.08 (1.69, 2.46)                                | <0.001  | -0.22 (-0.75, 0.30)              | 0.40    |
| IL-8                                                        | 0.77 (0.52, 1.02)                                    | <0.001  | 1.00 (0.77, 1.23)                                | <0.001  | -0.23 (-0.55, 0.09)              | 0.16    |
| CXCL10                                                      | 1.06 (0.72, 1.41)                                    | <0.001  | 1.45 (1.18, 1.71)                                | <0.001  | -0.38 (-0.77, 0.003)             | 0.05    |
| CCL2                                                        | 0.12 (0.03, 0.21)                                    | 0.01    | 0.15 (0.03, 0.27)                                | 0.02    | -0.03 (-0.16, 0.10)              | 0.68    |
| CCL5                                                        | 0.08 (-0.03, 0.19)                                   | 0.15    | 0.26 (0.17, 0.35)                                | <0.001  | -0.18 (-0.30, -0.05)             | 0.003   |
| M-CSF                                                       | 0.70 (0.29, 1.11)                                    | <0.001  | 1.06 (0.47, 1.65)                                | <0.001  | -0.36 (-1.04, 0.32)              | 0.30    |
| CCL4                                                        | 0.15 (0.02, 0.28)                                    | 0.03    | 0.27 (0.17, 0.38)                                | <0.001  | -0.13 (-0.27, 0.02)              | 0.09    |
| TNFSF10                                                     | 0.11 (-0.07, 0.29)                                   | 0.22    | 0.05 (-0.15, 0.24)                               | 0.65    | 0.07 (-0.18, 0.31)               | 0.60    |
| G-CSF                                                       | 0.79 (0.33, 1.24)                                    | <0.001  | 0.51 (-0.19, 1.20)                               | 0.15    | 0.28 (-0.51, 1.07)               | 0.49    |
| <b>PBMC Composition<sup>5</sup></b>                         |                                                      |         |                                                  |         |                                  |         |
| T Cells                                                     | -19.06 (-10.08, 28.04)                               | <0.001  | -24.57 (-33.68, -15.47)                          | <0.001  | 5.52 (-3.41, 14.44)              | 0.22    |

|                                       |                     |        |                     |        |                      |      |
|---------------------------------------|---------------------|--------|---------------------|--------|----------------------|------|
| B Cells                               | 3.56 (2.00, 5.11)   | <0.001 | 5.31 (3.16, 7.45)   | <0.001 | -1.75 (-3.78, 0.03)  | 0.09 |
| cMono                                 | 2.73 (0.51, 4.95)   | 0.02   | 3.59 (0.85, 6.33)   | 0.01   | -0.86 (-3.50, 1.78)  | 0.52 |
| intMono                               | 2.42 (0.97, 3.86)   | 0.001  | 2.06 (0.74, 3.38)   | 0.002  | 0.36 (-1.03, 1.75)   | 0.61 |
| ncMono                                | 3.31 (-1.69, 8.32)  | 0.19   | 5.61 (0.87, 10.35)  | 0.02   | -2.30 (-6.23, 1.63)  | 0.25 |
| <b>T Cell Phenotypes <sup>6</sup></b> |                     |        |                     |        |                      |      |
| CD4                                   | -1.54 (-7.26, 4.19) | 0.60   | 2.31 (-8.02, 12.64) | 0.66   | -3.85 (-14.92, 7.23) | 0.50 |
| CD8                                   | 3.47 (-1.41, 8.36)  | 0.16   | 1.11 (-5.14, 6.62)  | 0.81   | 2.37 (-4.22, 8.95)   | 0.48 |
| CD38+HLA-DR+CD4                       | 0.95 (0.50, 1.41)   | <0.001 | 0.98 (0.43, 1.53)   | <0.001 | -0.02 (-0.65, 0.60)  | 0.94 |
| CD38+HLA-DR+CD8                       | 2.18 (0.92, 3.44)   | 0.001  | 1.83 (0.78, 2.88)   | <0.001 | 0.35 (-0.61, 1.32)   | 0.47 |
| PD-1+TIM-3+CD4                        | 0.83 (0.38, 1.28)   | <0.001 | 0.74 (0.23, 1.25)   | 0.01   | 0.09 (-0.35, 0.54)   | 0.68 |
| PD-1+TIM-3+CD8                        | 1.23 (0.65, 1.81)   | <0.001 | 1.01 (0.42, 1.60)   | <0.001 | 0.22 (-0.38, 0.81)   | 0.57 |

<sup>1</sup>Adjusted for age

<sup>2</sup>OD450. N<sub>F\_Pt</sub> = 42, N<sub>F\_HCW</sub> = 74, N<sub>M\_Pt</sub> = 39, N<sub>M\_HCW</sub> = 13 (IgG), 4 (IgM).

<sup>3</sup>Log<sub>10</sub> pg/mL. N<sub>F\_Pt</sub> = 44, N<sub>F\_HCW</sub> = 43, N<sub>M\_Pt</sub> = 41, N<sub>M\_HCW</sub> = 15.

<sup>4</sup>As percent of live cells. N<sub>F\_Pt</sub> = 42, N<sub>F\_HCW</sub> = 29, N<sub>M\_Pt</sub> = 39, N<sub>M\_HCW</sub> = 6.

<sup>5</sup>As percent of CD3-positive cells. N<sub>F\_Pt</sub> = 42, N<sub>F\_HCW</sub> = 43, N<sub>M\_Pt</sub> = 39, N<sub>M\_HCW</sub> = 6.

**Extended Data Table 6.** Age-Adjusted least square means difference in baseline immune response between male and female Cohort A patients with deteriorated versus stabilized disease course<sup>1</sup>

|                                                                 | <b>Female Deteriorated (n=6)<br/>vs. Female Stabilized (n=16)</b> |         | <b>Male Deteriorated (n=6) vs.<br/>Male Stabilized (n=11)</b> |         | <b>Difference-in-Differences</b> |         |
|-----------------------------------------------------------------|-------------------------------------------------------------------|---------|---------------------------------------------------------------|---------|----------------------------------|---------|
|                                                                 | Difference (95% CI)                                               | p-value | Difference (95% CI)                                           | p-value | Difference (95%<br>CI)           | p-value |
| <b>PBMC Composition</b>                                         |                                                                   |         |                                                               |         |                                  |         |
| CD38+HLA-DR+CD4 <sup>3</sup>                                    | 0.82 (-0.92, 2.56)                                                | 0.58    | -0.34 (-2.54, 1.85)                                           | 0.97    | 1.16 (-0.93, 3.25)               | 0.27    |
| CD38+HLA-DR+CD8 <sup>3</sup>                                    | -0.07 (-2.46, 2.32)                                               | 0.99    | -0.93 (-3.95, 2.10)                                           | 0.84    | 0.86 (-3.73, 2.02)               | 0.55    |
| PD-1+TIM-3+CD4 <sup>3</sup>                                     | 0.64 (-0.55, 1.84)                                                | 0.48    | -0.39 (-1.89, 1.13)                                           | 0.90    | 1.02 (-0.41, 2.46)               | 0.16    |
| PD-1+TIM-3+CD8 <sup>3</sup>                                     | -0.44 (-2.25, 1.37)                                               | 0.91    | -0.43 (-2.72, 1.85)                                           | 0.96    | -0.01 (-2.19, 2.17)              | 0.99    |
| IFN $\gamma$ +CD8 <sup>3</sup>                                  | 3.45 (-1.61, 8.51)                                                | 0.27    | -3.83 (-10.29, 2.63)                                          | 0.39    | 7.28 (1.15, 13.40)               | 0.02    |
| <b>Cytokines, Chemokines and<br/>Growth Factors<sup>4</sup></b> |                                                                   |         |                                                               |         |                                  |         |
| IL-8                                                            | -0.07 (-0.78, 0.64)                                               | 0.99    | -0.36 (-1.24, 0.52)                                           | 0.69    | 0.29 (-0.54, 1.16)               | 0.49    |
| IL-18                                                           | 0.27 (-0.16, 0.70)                                                | 0.34    | 0.21 (-0.32, 0.74)                                            | 0.71    | 0.06 (-0.44, 0.56)               | 0.81    |
| CXCL10                                                          | 1.11 (0.12, 2.10)                                                 | 0.02    | 0.10 (-1.13, 1.32)                                            | 0.99    | 1.02 (-0.14, 2.17)               | 0.08    |
| sCD40L                                                          | -0.51 (-0.95, -0.07)                                              | 0.01    | -0.64 (-1.18, -0.09)                                          | 0.02    | 0.12 (-0.39, 0.64)               | 0.62    |
| CCL5                                                            | 0.19 (-0.17, 0.55)                                                | 0.50    | 0.27 (-0.18, 0.72)                                            | 0.39    | -0.08 (-0.50, 0.35)              | 0.71    |
| TNFSF10                                                         | 0.36 (-0.04, 0.75)                                                | 0.09    | -0.23 (-0.72, 0.26)                                           | 0.58    | 0.59 (0.13, 1.04)                | 0.01    |
| M-CSF                                                           | 0.71 (-0.19, 1.62)                                                | 0.16    | 0.15 (-0.98, 1.27)                                            | 0.98    | 0.57 (-0.49, 1.62)               | 0.28    |
| IL-15                                                           | 0.47 (-0.18, 1.12)                                                | 0.22    | -0.26 (-1.06, 0.54)                                           | 0.81    | 0.73 (-0.02, 1.48)               | 0.06    |

<sup>1</sup>Adjusted for age

<sup>2</sup>As percent of live cells

<sup>3</sup>As percent of CD3-positive cells

<sup>4</sup>Log<sub>10</sub> pg/mL

**Extended Data Table 7.** Markers used for the identification of cell subsets in flow cytometry analyses.

|                                                           |                                                    |
|-----------------------------------------------------------|----------------------------------------------------|
| PBMC/Single Cells/Single Cells/Live...                    | Live singlet gate                                  |
| .../CD19+CD3-                                             | B cells                                            |
| .../CD19-CD3+                                             | T cells                                            |
| .../CD19-CD3+/CD3+CD56+                                   | NKT cells                                          |
| .../CD19-CD3-/CD56+CD66b-                                 | NK cells                                           |
| .../CD19-CD3-/CD56-CD66b-/CD14+CD16-                      | Classical Monocytes (cMono)                        |
| .../CD19-CD3-/CD56-CD66b-/CD14+CD16var                    | Intermediate Monocytes (intMono)                   |
| .../CD19-CD3-/CD56-CD66b-/CD14-CD16+                      | Non-Classical Monocytes (ncMono)                   |
| .../CD19-CD3-/CD56-CD66b-/CD14-CD16-/CD304+               | Plasmacytoid DCs (pDC)                             |
| .../CD19-CD3-/CD56-CD66b-/CD14-CD16-/CD304-/CD11b+        | Macrophages                                        |
| .../CD19-CD3-/CD56-CD66b-/CD14-CD16-/CD304-/CD141+HLA-DR+ | cDC1                                               |
| .../CD19-CD3-/CD56-CD66b-/CD14-CD16-/CD304-/CD1c+HLA-DR+  | cDC2                                               |
| .../CD3+/CD8+CD4-                                         | CD8 T cells                                        |
| .../CD3+/CD8+CD4-/CD3+CD45RA+/CD127+CCR7+/CD3+PD1-        | Naïve CD8T                                         |
| .../CD3+/CD8+CD4-/CD3+CD45RA+/CD127-CCR7-                 | CD8Temra                                           |
| .../CD3+/CD8+CD4-/CD3+CD45RA-/CD127+CCR7+                 | Central Memory CD8T (CD8Tcm)                       |
| .../CD3+/CD8+CD4-/CD3+CD45RA-/CD127+CCR7-                 | Effector Memory CD8T (CD8Tem)                      |
| .../CD3+/CD8+CD4-/CD3+CD45RA-/TIM3+PD1+                   | PD-1+TIM-3+CD8 (terminally differentiated CD8)     |
| .../CD3+/CD8+CD4-/CD3+CD45RA-/CXCR5+PD1+                  | Follicular CD8T (FollicCD8)                        |
| .../CD3+/CD8+CD4-/CD38+HLA-DR+                            | CD38+HLA-DR+CD8 (TCR-activated CD8)                |
| .../CD3+/CD8+CD4-/GranzymeB+                              | Granzyme B-expressing CD8T (CD8GzB)                |
| .../CD3+/CD8+CD4-/IFN $\gamma$ +                          | IFN $\gamma$ - expressing CD8T (IFN $\gamma$ +CD8) |
| .../CD3+/CD8+CD4-/TNF $\alpha$ +                          | TNF $\alpha$ -expressing CD8T (TNF $\alpha$ CD8)   |
| .../CD3+/CD8+CD4-/IL2+                                    | IL2- expressing CD8T (IL2+CD8)                     |
| .../CD3+/CD8+CD4-/IL6+                                    | IL6-expressing CD8T (IL6+CD8)                      |
| .../CD3+/CD8+CD4-/CXCR3+                                  | CXCR3-expressing CD8T (CXCR3+CD8)                  |
| .../CD3+/CD8-CD4+                                         | CD4 T cells                                        |
| .../CD3+/CD8-CD4+/CD3+CD45RA+/CD127+CCR7+/CD3+PD1-        | Naïve CD4T                                         |
| .../CD3+/CD8-CD4+/CD3+CD45RA+/CD127-CCR7-                 | CD4Temra                                           |
| .../CD3+/CD8-CD4+/CD3+CD45RA+/CD127-CD25hi/CD3+HLA-DR-    | Resting Natural Regulatory CD4T (CD4rnTreg)        |

|                                                         |                                                                |
|---------------------------------------------------------|----------------------------------------------------------------|
| .../CD3+/CD8-CD4+/CD3+CD45RA-/CD127+CCR7+               | Central Memory CD4T<br>(CD4Tcm)                                |
| .../CD3+/CD8-CD4+/CD3+CD45RA-/CD127+CCR7-               | Effector Memory CD4T<br>(CD4Tem)                               |
| .../CD3+/CD8-CD4+/CD3+CD45RA-/TIM3+PD1+                 | PD-1+TIM-3+ CD4T<br>(terminally differentiated<br>CD4 T cells) |
| CD3+/CD8-CD4+/CD3+CD45RA-/CD127-CD25hi Treg/CD3+HLA-DR+ | Effector Regulatory CD4T<br>(CD4effTreg)                       |
| CD3+/CD8-CD4+/CD3+CD45RA-/CD127-CD25hi Treg/CD3+HLA-DR- | Natural Regulatory CD4T<br>(CD4nTreg)                          |
| .../CD3+/CD8-CD4+/CD38+HLA-DR+                          | CD38+HLA-DR+CD4T<br>(TCR-activated CD4)                        |
| .../CD3+/CD8-CD4+/IFN $\gamma$ +                        | IFN $\gamma$ - expressing CD4T<br>(IFN $\gamma$ +CD4)          |
| .../CD3+/CD8-CD4+/TNF $\alpha$ +                        | TNF $\alpha$ -expressing CD4T<br>(TNF $\alpha$ +CD4)           |
| .../CD3+/CD8-CD4+/IL2+                                  | IL2- expressing CD4T<br>(IL2+CD4)                              |
| .../CD3+/CD8-CD4+/IL6+                                  | IL6-expressing CD4T<br>(IL6+CD4)                               |
| .../CD3+/CD8-CD4+/IL4+                                  | IL4-expressing CD4T<br>(IL4+CD4)                               |
| .../CD3+/CD8-CD4+/IL17+                                 | IL17-expressing CD4T<br>(IL17+CD4)                             |
| .../CD3+/CD8-CD4+/CD3+CXCR3+                            | CXCR3-expressing CD4T<br>(CXCR3+CD4)                           |
